# Supplementary material for: Dual-channel recognition of Al3+ and Cu2+ ions using a chiral pyrene-based fluorescent sensor
Source: Royal Society of Chemistry journal article supplement (doi:10.1039/d2nj00801g), 2022-01-01

## Dual-channel recognition of Al<sup>3+</sup> and Cu<sup>2+</sup> ions using a chiral pyrene-based fluorescent sensor

Yuki Matsuura, Masatoshi Asami and Suguru Ito\*

*Department of Chemistry and Life Science, Graduate School of Engineering Science*

*Yokohama National University*

*79-5 Tokiwadai, Hodogaya-ku, Yokohama 240-8501, Japan*

\*E-mail: suguru-ito@ynu.ac.jp

### Table of contents

|                                                                          |     |
|--------------------------------------------------------------------------|-----|
| 1. Supplementary spectral data.....                                      | S2  |
| 2. Determination of association constants by fluorescence titration..... | S6  |
| 3. The reaction of (S,S)-1 with Cu <sup>2+</sup> .....                   | S11 |
| 4. References.....                                                       | S13 |
| <sup>1</sup> H and <sup>13</sup> C NMR spectra.....                      | S14 |

## 1. Supplementary spectral data

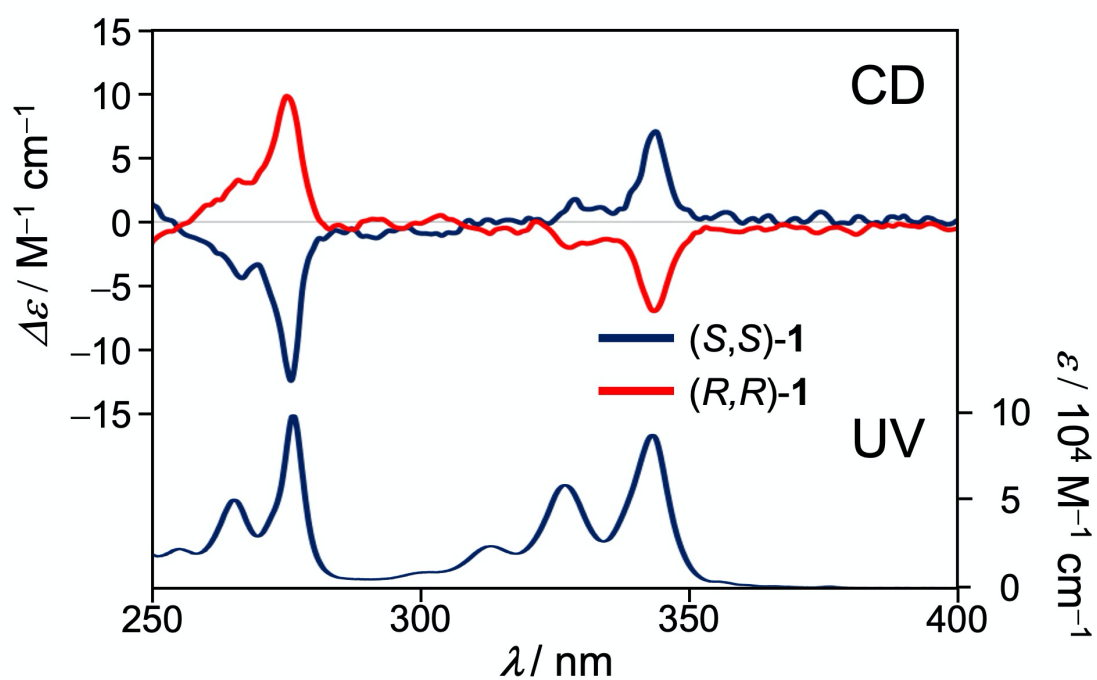

Fig. S1 UV and CD spectra of (S,S)-1 and (R,R)-1 in  $\text{CH}_3\text{CN}$  ( $1.0 \times 10^{-5}$  M).

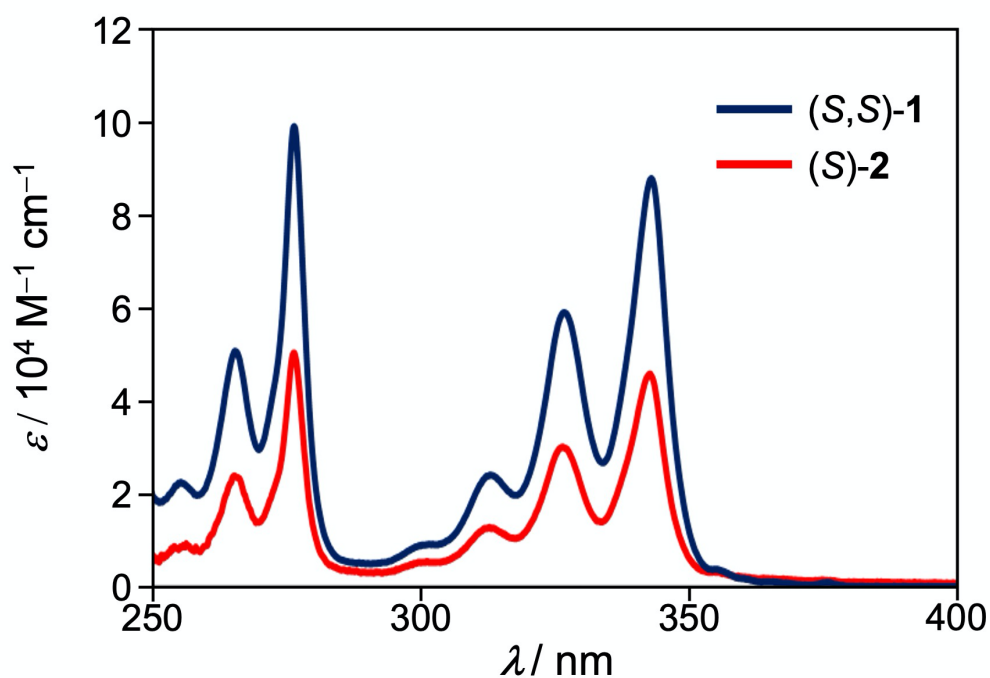

Fig. S2 UV spectra of (S,S)-1 and (S)-2 in  $\text{CH}_3\text{CN}$  ( $1.0 \times 10^{-5}$  M).

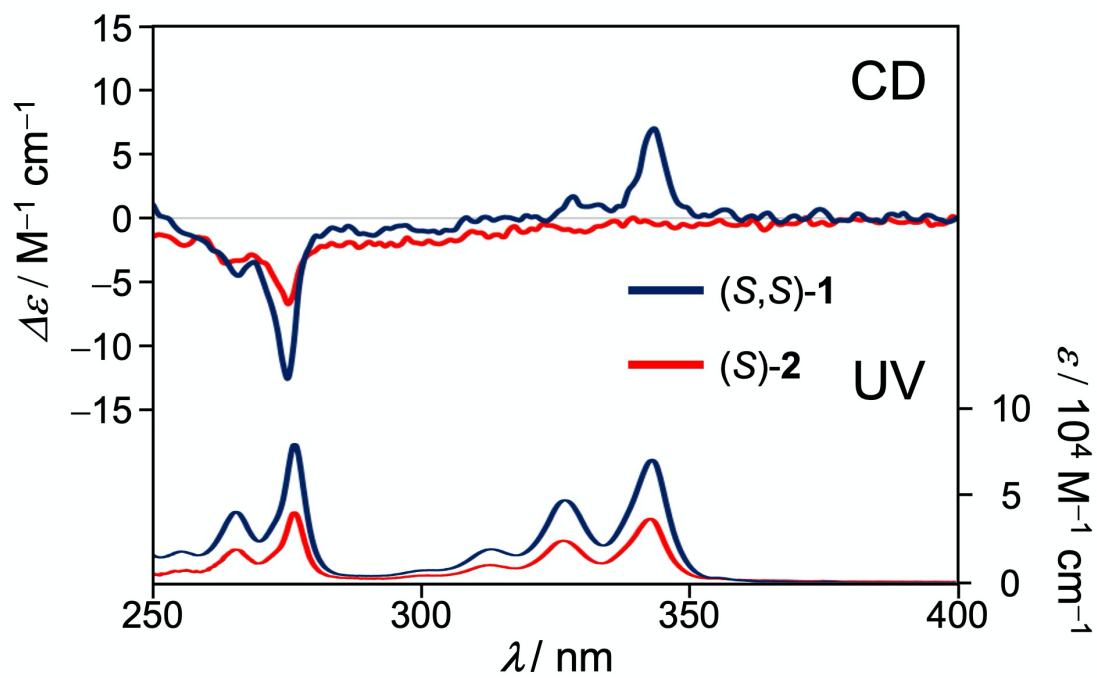

**Fig. S3** UV and CD spectra of (S,S)-1 and (S)-2 in  $\text{CH}_3\text{CN}$  ( $1.0 \times 10^{-5} \text{ M}$ ).

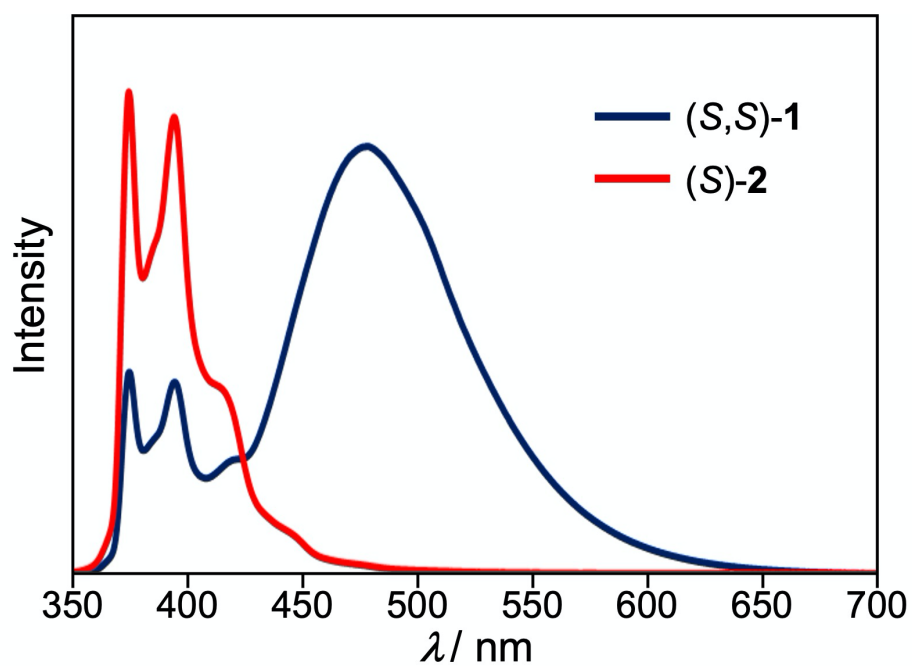

**Fig. S4** Fluorescence spectra of (S,S)-1 in  $\text{CH}_3\text{CN}$  ( $1.0 \times 10^{-5} \text{ M}$ ) and (S)-2 in  $\text{CH}_3\text{CN}$  ( $2.0 \times 10^{-5} \text{ M}$ ) excited at 343 nm.

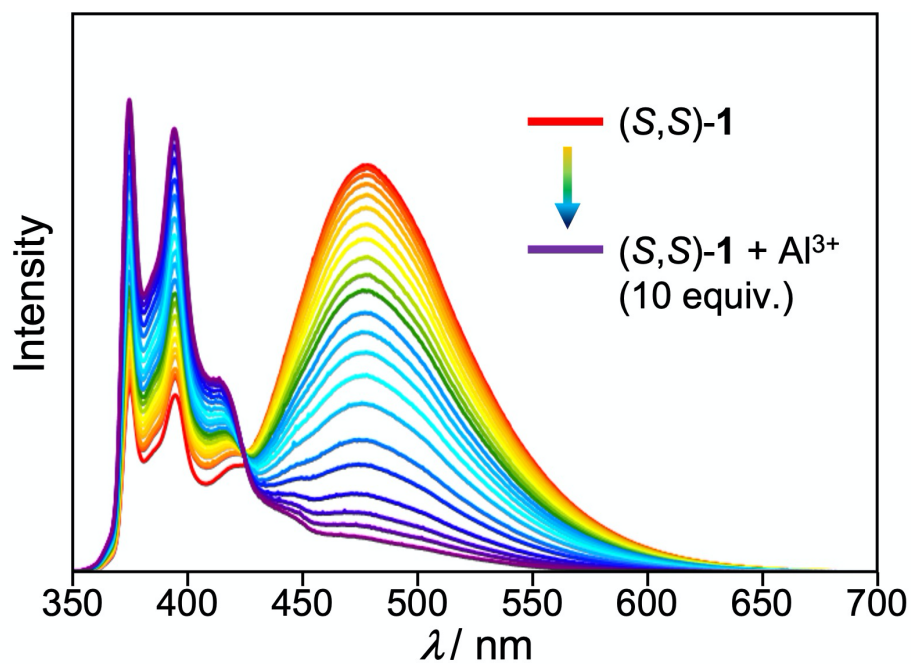

**Fig. S5** Fluorescence spectra of *(S,S)*-1 with  $\text{Al}^{3+}$  (0–10 equivalents) in  $\text{CH}_3\text{CN}$  ( $5.0 \times 10^{-6}$  M) excited at 343 nm.

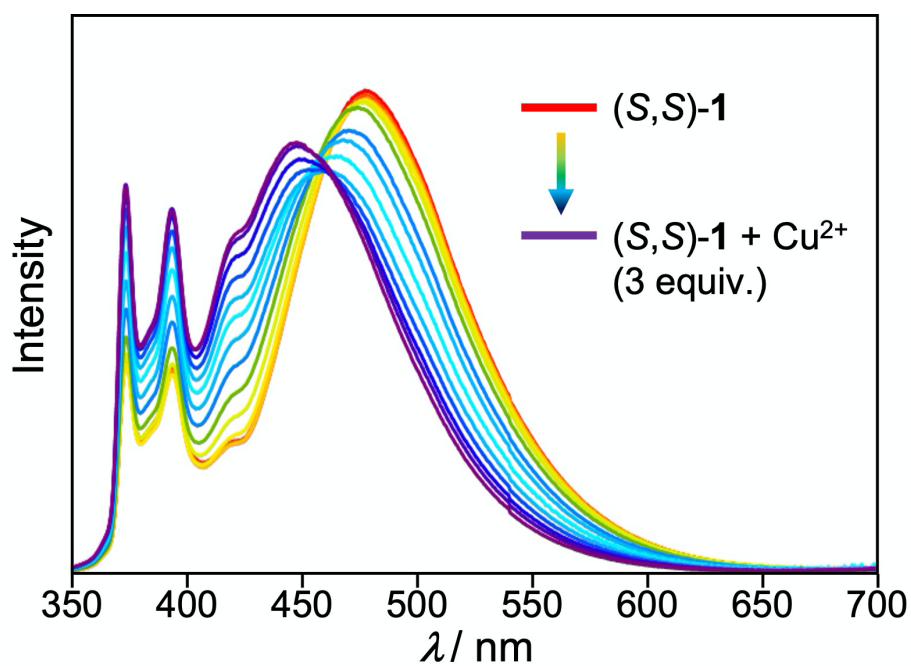

**Fig. S6** Fluorescence spectra of *(S,S)*-1 with  $\text{Cu}^{2+}$  (0–3 equivalents) in  $\text{CH}_3\text{CN}$  ( $5.0 \times 10^{-6}$  M) excited at 343 nm.

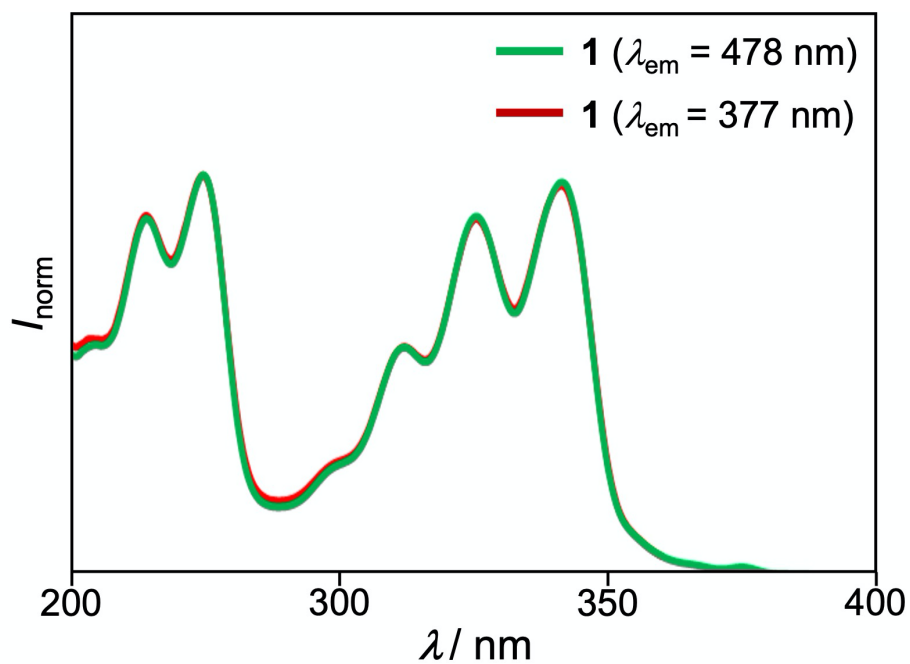

**Fig. S7** Excitation spectra of (*S,S*)-1 observed at 377 nm or 478 nm in CH<sub>3</sub>CN ( $1.0 \times 10^{-5}$  M).

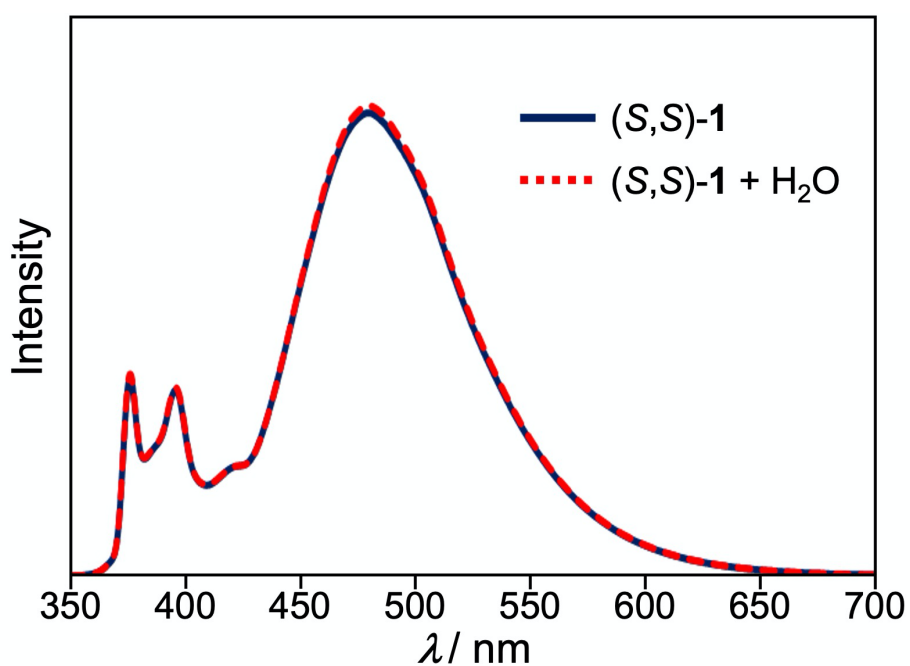

**Fig. S8** Fluorescence spectra of (*S,S*)-1 and (*S,S*)-1 with H<sub>2</sub>O (90 equiv.) in CH<sub>3</sub>CN ( $5.0 \times 10^{-6}$  M) excited at 343 nm.

## 2. Determination of association constants by fluorescence titration

Association constant  $K_a$  of host–guest complexes is defined

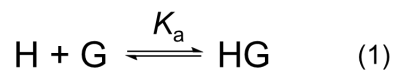

$$K_a = \frac{[\text{HG}]}{[\text{H}][\text{G}]} \quad (2)$$

$$[\text{H}] = [\text{H}]_0 - [\text{HG}] \quad [\text{G}] = [\text{G}]_0 - [\text{HG}]$$

$$K_a = \frac{[\text{HG}]}{[\text{H}][\text{G}]} = \frac{[\text{HG}]}{([\text{H}]_0 - [\text{HG}])([\text{G}]_0 - [\text{HG}])} \quad (3)$$

where  $[\text{H}]$ ,  $[\text{G}]$ , and  $[\text{HG}]$ , and  $[\text{HG}_2]$  represent molar concentrations of the host, guest, and 1:1 complex of host–guest, respectively.

The results were analysed by the nonlinear curve fitting program using Bindfit.<sup>1-3</sup> Each titration experiment was carried out three times. The results are summarized in Tables S1 and S2.

**Table S1.** Data tables for fluorescence titration of (*S,S*)-**1** with Al<sup>3+</sup>.**1st titration**

| [Al <sup>3+</sup> ] <sub>0</sub> 10 <sup>-6</sup> M | <i>I</i> <sub>377 nm</sub> (a.u.) | <i>I</i> <sub>412 nm</sub> (a.u.) | <i>I</i> <sub>447 nm</sub> (a.u.) | <i>I</i> <sub>520 nm</sub> (a.u.) |
|-----------------------------------------------------|-----------------------------------|-----------------------------------|-----------------------------------|-----------------------------------|
| 0.00                                                | 175.98                            | 101.25                            | 267.52                            | 254.94                            |
| 0.53                                                | 183.45                            | 117.87                            | 270.27                            | 251.54                            |
| 1.01                                                | 186.30                            | 118.40                            | 265.77                            | 247.60                            |
| 1.52                                                | 192.15                            | 120.48                            | 261.32                            | 242.09                            |
| 2.05                                                | 201.95                            | 127.86                            | 256.31                            | 234.09                            |
| 2.54                                                | 208.83                            | 129.93                            | 249.17                            | 226.50                            |
| 3.05                                                | 218.70                            | 133.23                            | 238.95                            | 216.74                            |
| 3.59                                                | 228.01                            | 138.04                            | 230.70                            | 206.93                            |
| 4.08                                                | 240.36                            | 142.18                            | 220.64                            | 195.03                            |
| 4.59                                                | 252.52                            | 147.58                            | 212.77                            | 184.84                            |
| 5.10                                                | 263.82                            | 150.43                            | 201.78                            | 174.16                            |
| 6.38                                                | 276.72                            | 154.66                            | 189.22                            | 161.41                            |
| 7.66                                                | 292.44                            | 163.10                            | 179.12                            | 148.49                            |
| 10.08                                               | 303.83                            | 164.95                            | 167.00                            | 136.51                            |
| 15.39                                               | 320.25                            | 171.67                            | 154.18                            | 121.20                            |
| 20.36                                               | 338.10                            | 178.66                            | 138.58                            | 103.70                            |
| 25.50                                               | 359.95                            | 184.73                            | 116.40                            | 80.73                             |
| 30.55                                               | 376.80                            | 190.39                            | 102.56                            | 65.60                             |
| 35.76                                               | 396.80                            | 196.57                            | 86.11                             | 47.15                             |
| 40.89                                               | 410.85                            | 202.97                            | 75.15                             | 35.60                             |
| 45.92                                               | 420.34                            | 206.62                            | 67.50                             | 27.04                             |
| 51.10                                               | 426.86                            | 208.51                            | 61.28                             | 20.00                             |
| 101.12                                              | 437.59                            | 211.68                            | 54.50                             | 12.85                             |
| 152.78                                              | 443.10                            | 214.07                            | 50.39                             | 7.83                              |
| 203.58                                              | 446.96                            | 215.44                            | 49.60                             | 5.14                              |
| 255.89                                              | 450.40                            | 216.44                            | 47.41                             | 3.98                              |
| 510.90                                              | 452.94                            | 220.87                            | 49.05                             | 4.15                              |

[(*S,S*)-**1**]<sub>0</sub> = 5.1 × 10<sup>-6</sup> M

**2nd titration**

| $[\text{Al}^{3+}]_0 \cdot 10^{-6} \text{ M}$ | $I_{377 \text{ nm}} \text{ (a.u.)}$ | $I_{412 \text{ nm}} \text{ (a.u.)}$ | $I_{447 \text{ nm}} \text{ (a.u.)}$ | $I_{520 \text{ nm}} \text{ (a.u.)}$ |
|----------------------------------------------|-------------------------------------|-------------------------------------|-------------------------------------|-------------------------------------|
| 0.00                                         | 174.65                              | 100.67                              | 269.16                              | 255.77                              |
| 0.50                                         | 173.92                              | 99.42                               | 260.87                              | 247.18                              |
| 1.00                                         | 177.20                              | 101.30                              | 257.82                              | 244.16                              |
| 1.51                                         | 183.76                              | 104.15                              | 253.57                              | 238.70                              |
| 2.01                                         | 190.31                              | 106.41                              | 247.22                              | 231.75                              |
| 2.52                                         | 199.05                              | 109.84                              | 239.50                              | 222.50                              |
| 3.02                                         | 207.88                              | 112.88                              | 228.76                              | 211.70                              |
| 3.53                                         | 217.61                              | 116.91                              | 219.54                              | 201.06                              |
| 4.04                                         | 227.67                              | 120.58                              | 209.37                              | 191.08                              |
| 4.53                                         | 240.16                              | 124.94                              | 200.66                              | 180.85                              |
| 5.03                                         | 250.21                              | 128.98                              | 189.86                              | 168.04                              |
| 6.30                                         | 266.78                              | 136.47                              | 177.17                              | 154.46                              |
| 7.55                                         | 283.65                              | 143.50                              | 163.40                              | 138.47                              |
| 10.11                                        | 299.13                              | 148.90                              | 148.45                              | 122.84                              |
| 15.13                                        | 317.71                              | 156.06                              | 136.58                              | 108.98                              |
| 20.06                                        | 338.13                              | 163.29                              | 118.63                              | 89.08                               |
| 25.09                                        | 365.17                              | 172.21                              | 97.34                               | 65.75                               |
| 30.21                                        | 382.72                              | 178.58                              | 82.61                               | 49.27                               |
| 35.23                                        | 398.97                              | 184.25                              | 66.75                               | 32.43                               |
| 40.33                                        | 414.00                              | 189.86                              | 56.55                               | 21.76                               |
| 45.32                                        | 424.53                              | 193.76                              | 50.63                               | 14.67                               |
| 50.38                                        | 430.55                              | 196.11                              | 46.70                               | 10.36                               |
| 100.97                                       | 436.79                              | 198.89                              | 43.39                               | 6.49                                |
| 150.56                                       | 440.56                              | 200.57                              | 41.80                               | 4.72                                |
| 201.02                                       | 443.65                              | 202.71                              | 42.16                               | 4.42                                |
| 252.27                                       | 443.94                              | 204.63                              | 42.46                               | 4.47                                |
| 503.03                                       | 447.72                              | 210.72                              | 44.81                               | 4.81                                |

 $[(S,S)\text{-1}]_0 = 5.0 \times 10^{-6} \text{ M}$



**3rd titration**

| $[\text{Al}^{3+}]_0 \cdot 10^{-6} \text{ M}$ | $I_{377 \text{ nm}} \text{ (a.u.)}$ | $I_{412 \text{ nm}} \text{ (a.u.)}$ | $I_{447 \text{ nm}} \text{ (a.u.)}$ | $I_{520 \text{ nm}} \text{ (a.u.)}$ |
|----------------------------------------------|-------------------------------------|-------------------------------------|-------------------------------------|-------------------------------------|
| 0.00                                         | 176.65                              | 122.54                              | 254.92                              | 237.48                              |
| 0.51                                         | 177.62                              | 121.90                              | 252.36                              | 234.82                              |
| 1.03                                         | 180.92                              | 122.44                              | 251.44                              | 233.58                              |
| 1.52                                         | 182.96                              | 122.38                              | 244.68                              | 227.40                              |
| 2.06                                         | 187.71                              | 124.48                              | 240.13                              | 222.75                              |
| 2.55                                         | 193.63                              | 125.65                              | 234.59                              | 215.87                              |
| 3.07                                         | 203.24                              | 126.95                              | 220.68                              | 201.08                              |
| 3.57                                         | 210.60                              | 130.93                              | 216.98                              | 197.05                              |
| 4.09                                         | 220.04                              | 134.13                              | 209.69                              | 188.70                              |
| 4.60                                         | 229.08                              | 137.63                              | 201.74                              | 179.24                              |
| 5.10                                         | 238.87                              | 140.74                              | 192.71                              | 169.25                              |
| 6.39                                         | 255.65                              | 147.14                              | 180.22                              | 155.66                              |
| 7.67                                         | 270.64                              | 151.94                              | 164.75                              | 137.88                              |
| 10.33                                        | 286.64                              | 157.43                              | 150.03                              | 122.51                              |
| 15.33                                        | 306.43                              | 164.46                              | 134.43                              | 105.10                              |
| 20.48                                        | 331.79                              | 173.19                              | 114.04                              | 82.58                               |
| 25.53                                        | 355.43                              | 181.20                              | 95.55                               | 62.07                               |
| 30.71                                        | 376.75                              | 188.91                              | 77.33                               | 42.60                               |
| 35.79                                        | 394.72                              | 194.76                              | 63.91                               | 27.95                               |
| 40.78                                        | 404.92                              | 197.35                              | 55.80                               | 19.39                               |
| 45.89                                        | 415.40                              | 201.52                              | 49.65                               | 12.82                               |
| 51.10                                        | 425.64                              | 205.76                              | 47.17                               | 9.01                                |
| 102.35                                       | 429.01                              | 205.91                              | 44.25                               | 6.40                                |
| 152.68                                       | 429.96                              | 206.95                              | 44.17                               | 5.80                                |
| 204.24                                       | 432.20                              | 208.03                              | 44.09                               | 5.94                                |
| 254.84                                       | 433.55                              | 209.44                              | 44.52                               | 5.84                                |
| 511.60                                       | 437.07                              | 214.49                              | 45.94                               | 5.67                                |

$[(S,S)\text{-1}]_0 = 5.1 \times 10^{-6} \text{ M}$

**Table S2.** Association constants and error values obtained by the curve-fitting analysis of fluorescence titration data of (*S,S*)-**1** with Al<sup>3+</sup> using Bindfit calculator.

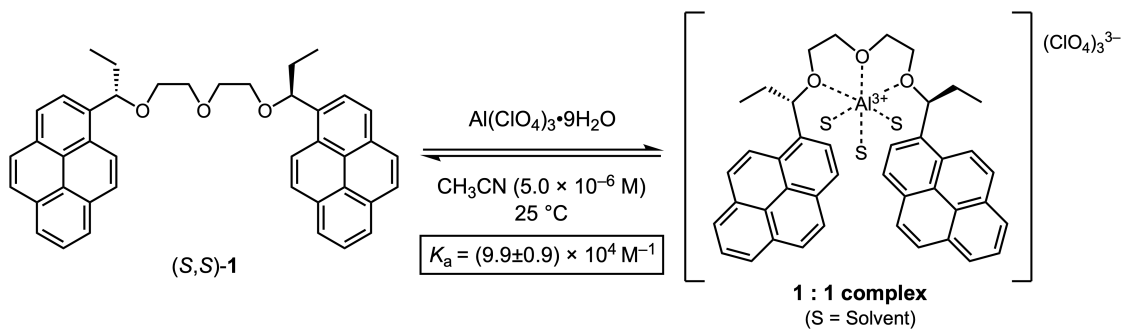

| Entry                      | $K_a$ ( $\text{M}^{-1}$ )   | Error (%) |
|----------------------------|-----------------------------|-----------|
| 1st titration <sup>a</sup> | 98201                       | ±5.4723   |
| 2nd titration <sup>b</sup> | 107357                      | ±5.7539   |
| 3rd titration <sup>c</sup> | 90651                       | ±6.6794   |
| Average                    | $(9.9 \pm 0.9) \times 10^4$ |           |

<sup>a</sup> Bindfit URL: <http://app.supramolecular.org/bindfit/view/fea2eab5-7ed3-481e-a790-bc8dcdbdfb38a>

<sup>b</sup> Bindfit URL: <http://app.supramolecular.org/bindfit/view/c7ba8225-cbde-43e3-9376-c50b89416e30>

<sup>c</sup> Bindfit URL: <http://app.supramolecular.org/bindfit/view/f035a784-7074-4e68-8168-b5b7aff8df54>

### 3. The reaction of (*S,S*)-1 with Cu<sup>2+</sup>

#### Fluorescence spectral change

To a CH<sub>3</sub>CN solution of (*S,S*)-1 ( $1.0 \times 10^{-4}$  M) were added 1.5 molar equivalents of Cu(ClO<sub>4</sub>)<sub>2</sub>·6H<sub>2</sub>O, and the mixture was stirred at room temperature. The maximum emission wavelength of the mixture was changed from 478 nm to 455 nm within 0.5 min (Fig. S9).

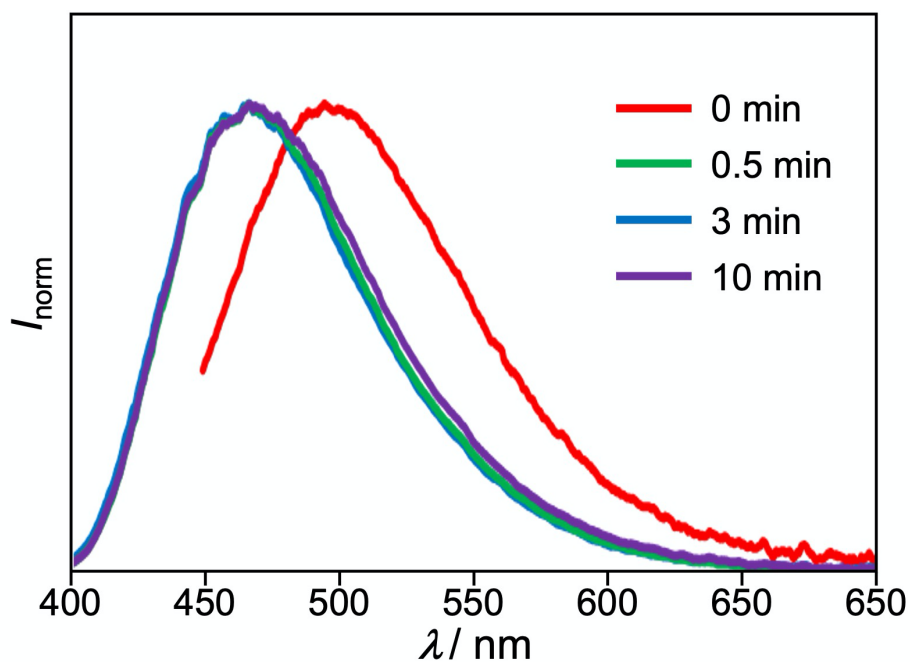

**Fig. S9** Fluorescence spectral change in the reaction of (*S,S*)-1 with Cu(ClO<sub>4</sub>)<sub>2</sub>·6H<sub>2</sub>O (1.5 equiv.) in CH<sub>3</sub>CN ( $1.0 \times 10^{-4}$  M) excited at 365 nm.

## <sup>1</sup>H NMR spectrum

The <sup>1</sup>H NMR spectrum of the crude mixture for the reaction of (*S,S*)-**1** with Cu(ClO<sub>4</sub>)<sub>2</sub>•6H<sub>2</sub>O suggested the conversion of (*S,S*)-**1** to intramolecularly cyclized products and intermolecularly dimerized products.

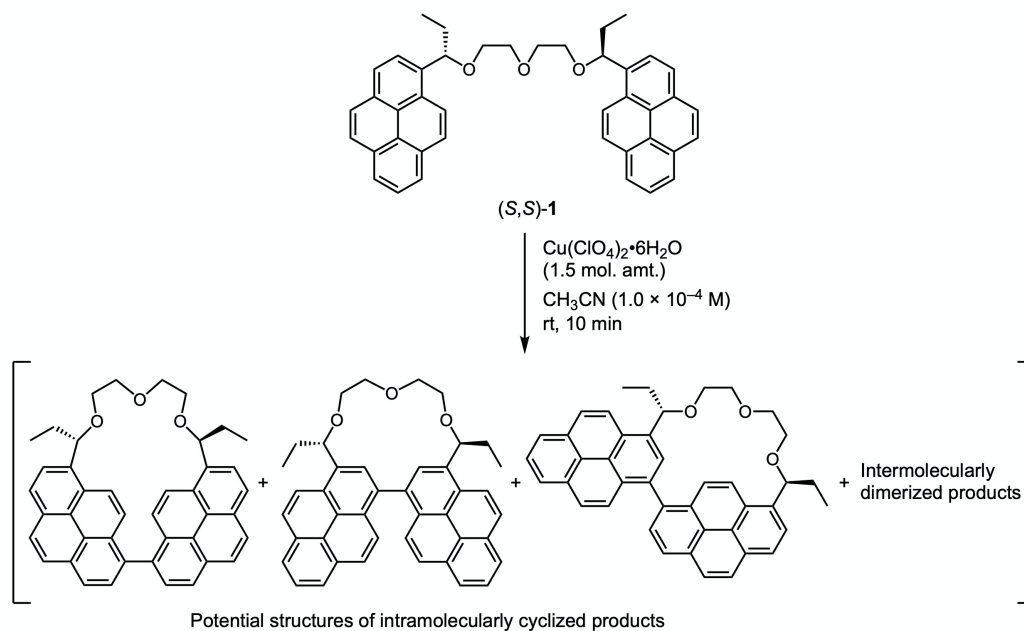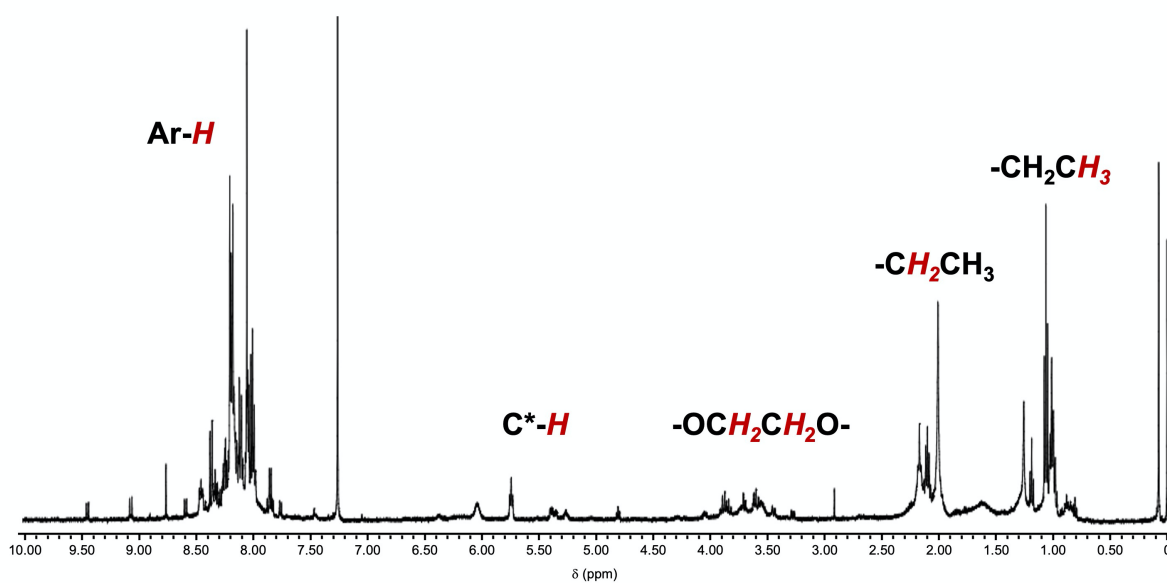

**Fig. 10** <sup>1</sup>H NMR spectrum of the crude mixture of (*S,S*)-**1** with Cu(ClO<sub>4</sub>)<sub>2</sub>•6H<sub>2</sub>O.

## ESI-HRMS analysis

The formation of intramolecularly cyclized product of (*S,S*)-**1** was suggested by the ESI-MS analysis of the mixture obtained by the reaction of (*S,S*)-**1** with  $\text{Cu}(\text{ClO}_4)_2 \cdot 6\text{H}_2\text{O}$  (Fig. S10).

## Sample preparation.

A 2.1 mM 0.1vol%-AcOH/ $\text{CH}_3\text{CN}$  solution of (*S,S*)-**1** (solution A) was prepared in a 10 mL volumetric flask by dissolving (*S,S*)-**1** (12.6 mg, 0.021 mmol) into 0.1vol%-AcOH/ $\text{CH}_3\text{CN}$ . A 5.6 mM 0.1vol%-AcOH/ $\text{CH}_3\text{CN}$  solution of  $\text{Cu}(\text{ClO}_4)_2 \cdot 6\text{H}_2\text{O}$  (solution B) was prepared in a 5 mL volumetric flask by dissolving  $\text{Cu}(\text{ClO}_4)_2 \cdot 6\text{H}_2\text{O}$  (10.5 mg, 0.028 mmol) into 0.1vol%-AcOH/ $\text{CH}_3\text{CN}$ . A  $1.0 \times 10^{-4}$  M 0.1vol%-AcOH/ $\text{CH}_3\text{CN}$  solution of  $\text{Cu}(\text{ClO}_4)_2 \cdot 6\text{H}_2\text{O}$  containing  $1.0 \times 10^{-5}$  M of (*S,S*)-**1** (solutions C) was prepared in a 5 mL volumetric flask by dilution of solution A (23  $\mu\text{L}$ ) and solution B (89  $\mu\text{L}$ ) with 0.1vol%-AcOH/ $\text{CH}_3\text{CN}$ .

## Eluent of LC.

0.1vol%-AcOH/ $\text{CH}_3\text{CN}$  (95%)/water (5%)

## Result.

HRMS-ESI ( $m/z$ ): [*(S,S)*-**1**-2H] $^+$  calcd for  $\text{C}_{42}\text{H}_{36}\text{O}_3$ , 588.2659; found, 588.2664.

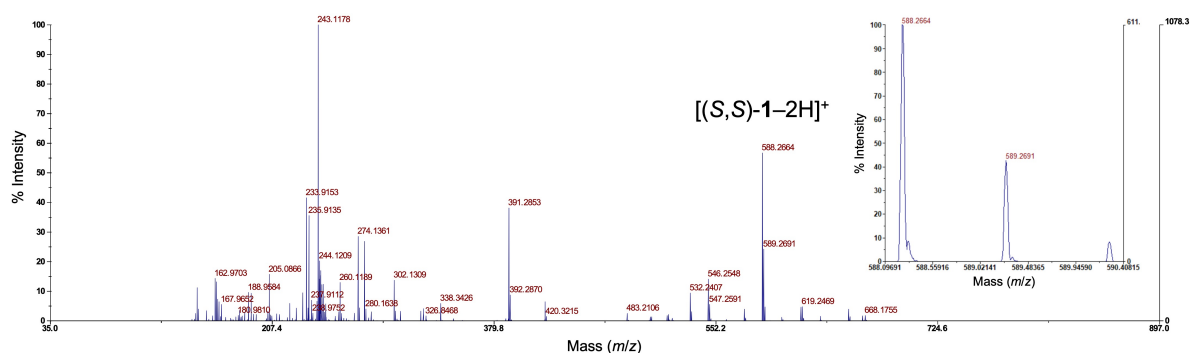

Fig. S11 ESI-MS spectrum of the mixture obtained by the reaction of (*S,S*)-**1** with  $\text{Cu}(\text{ClO}_4)_2 \cdot 6\text{H}_2\text{O}$ .

## 4. References

- 1) Bindfit. <http://app.supramolecular.org/bindfit/>, accessed Jan 5, 2022.
- 2) P. Thordarson, *Chem. Soc. Rev.*, 2011, **40**, 1305–1323.
- 3) D. B. Hibbert and P. Thordarson, *Chem. Commun.*, 2016, **52**, 12792–12805.

$^1\text{H}$  NMR spectrum of (*S,S*)-**1** (500 MHz,  $\text{CDCl}_3$ , rt)

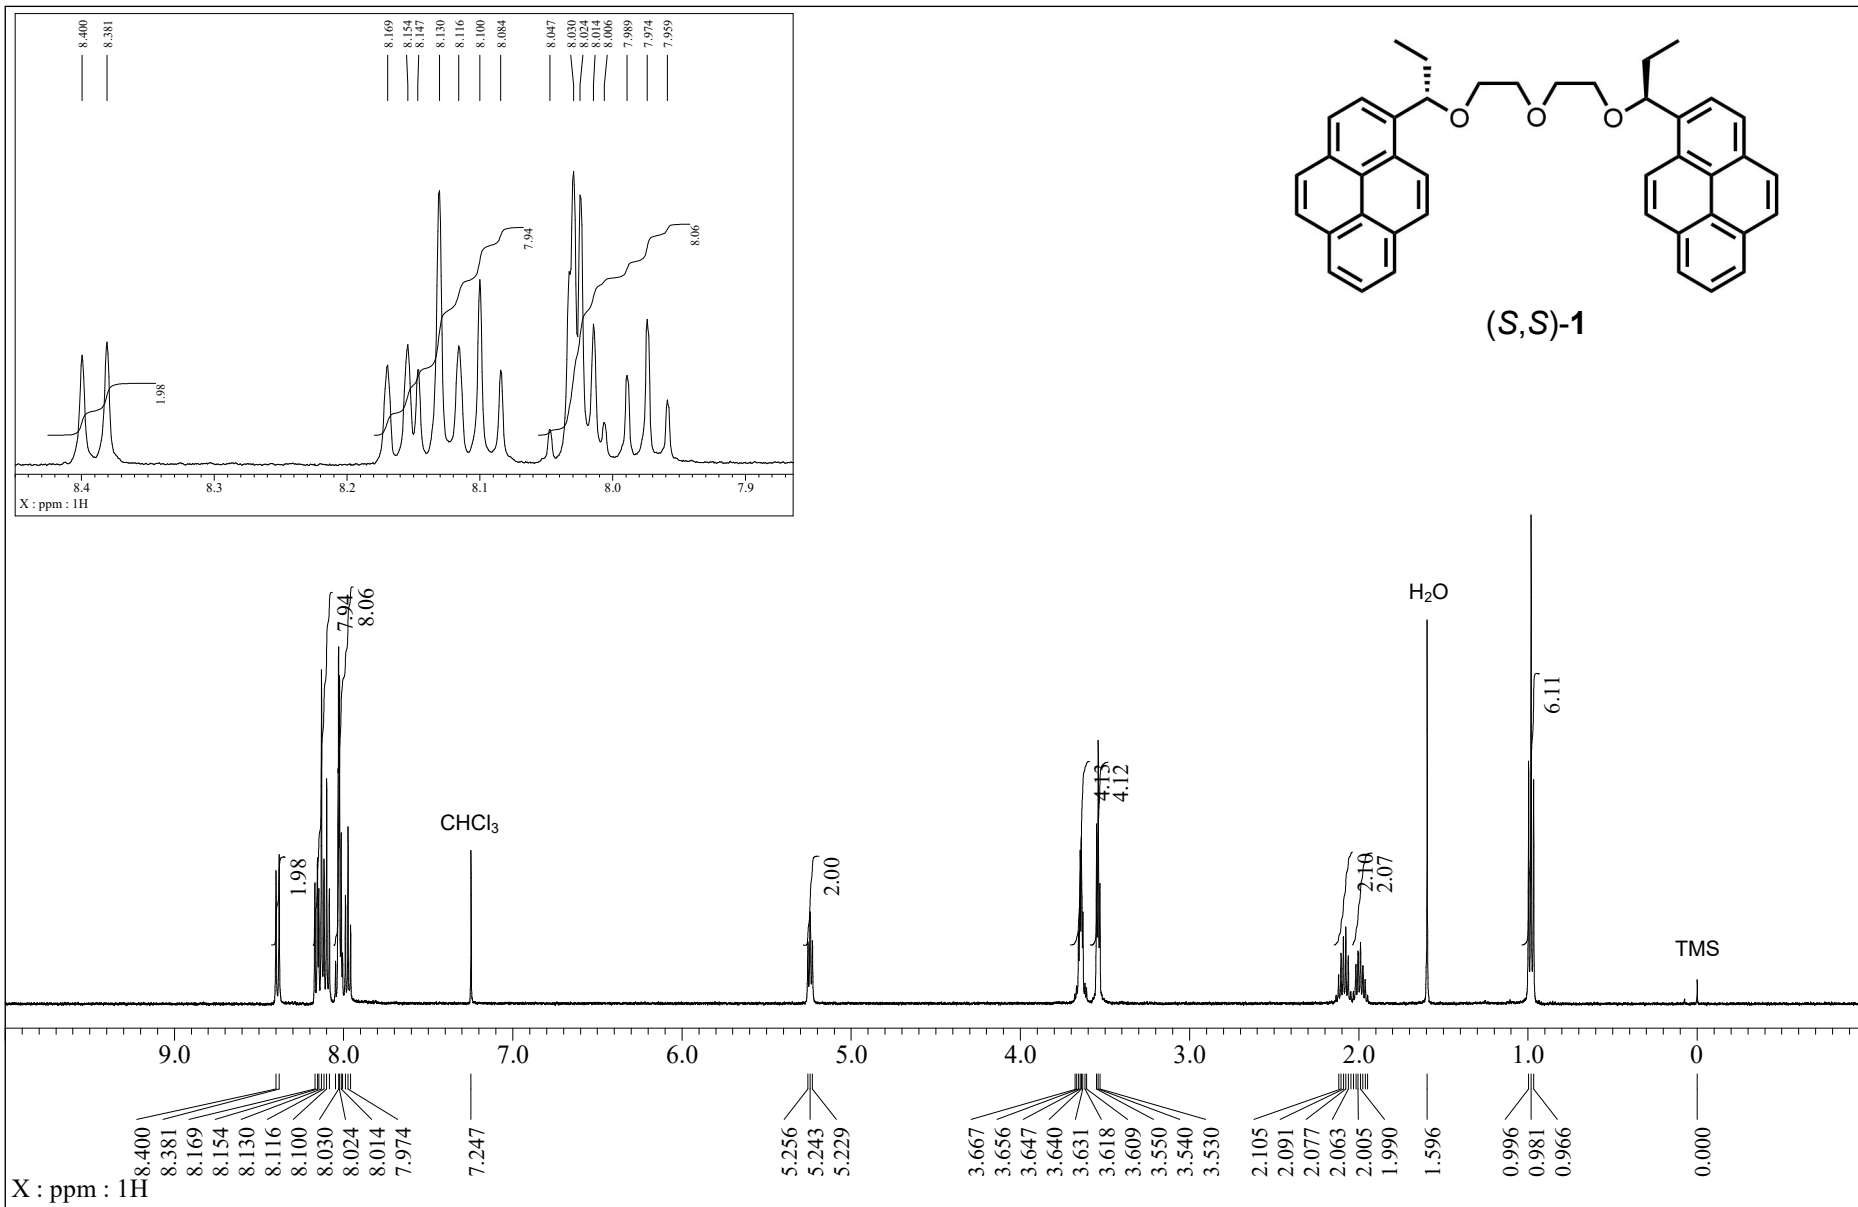

<sup>13</sup>C NMR spectrum of (S,S)-1 (126 MHz, CDCl<sub>3</sub>, rt)

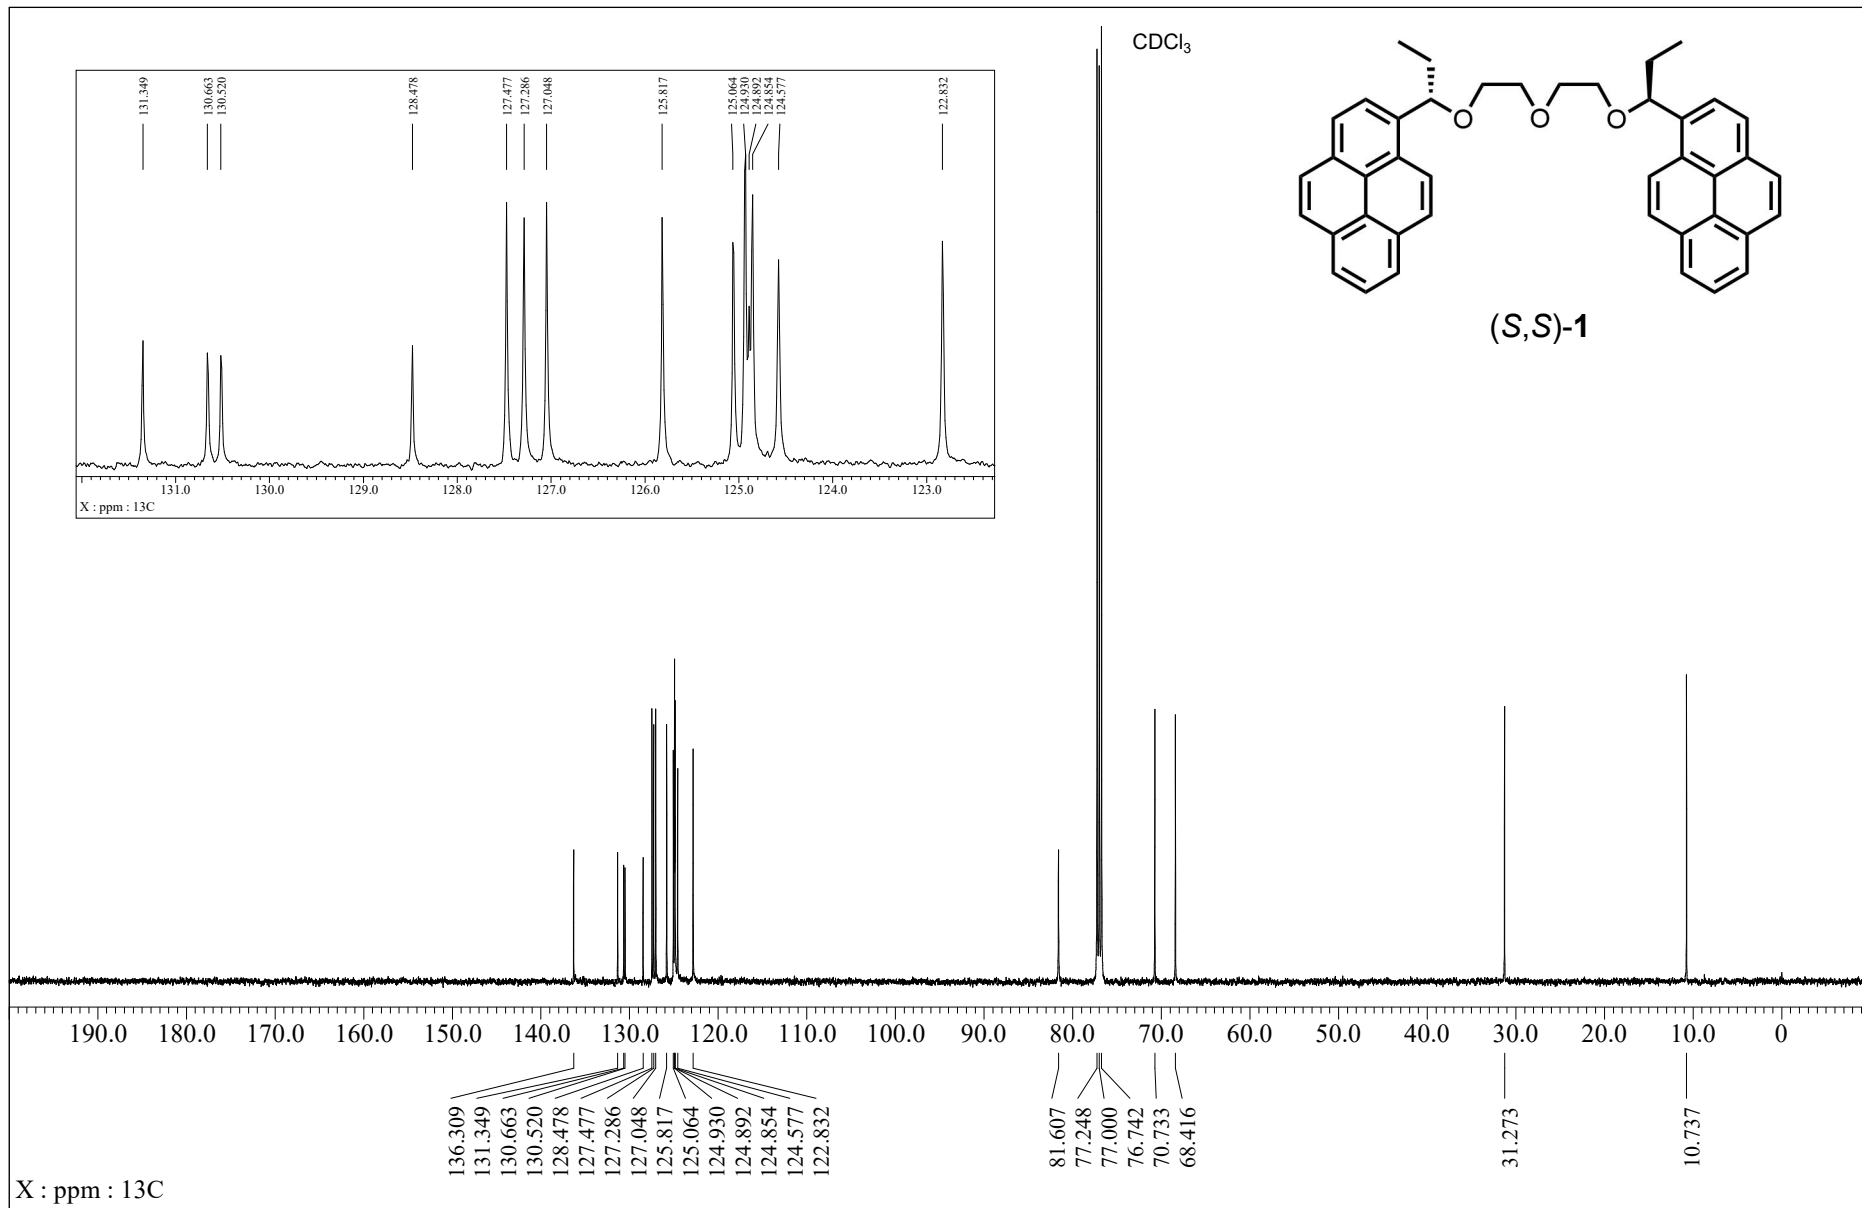

<sup>1</sup>H NMR spectrum of (S)-2 (500 MHz, CDCl<sub>3</sub>, rt)

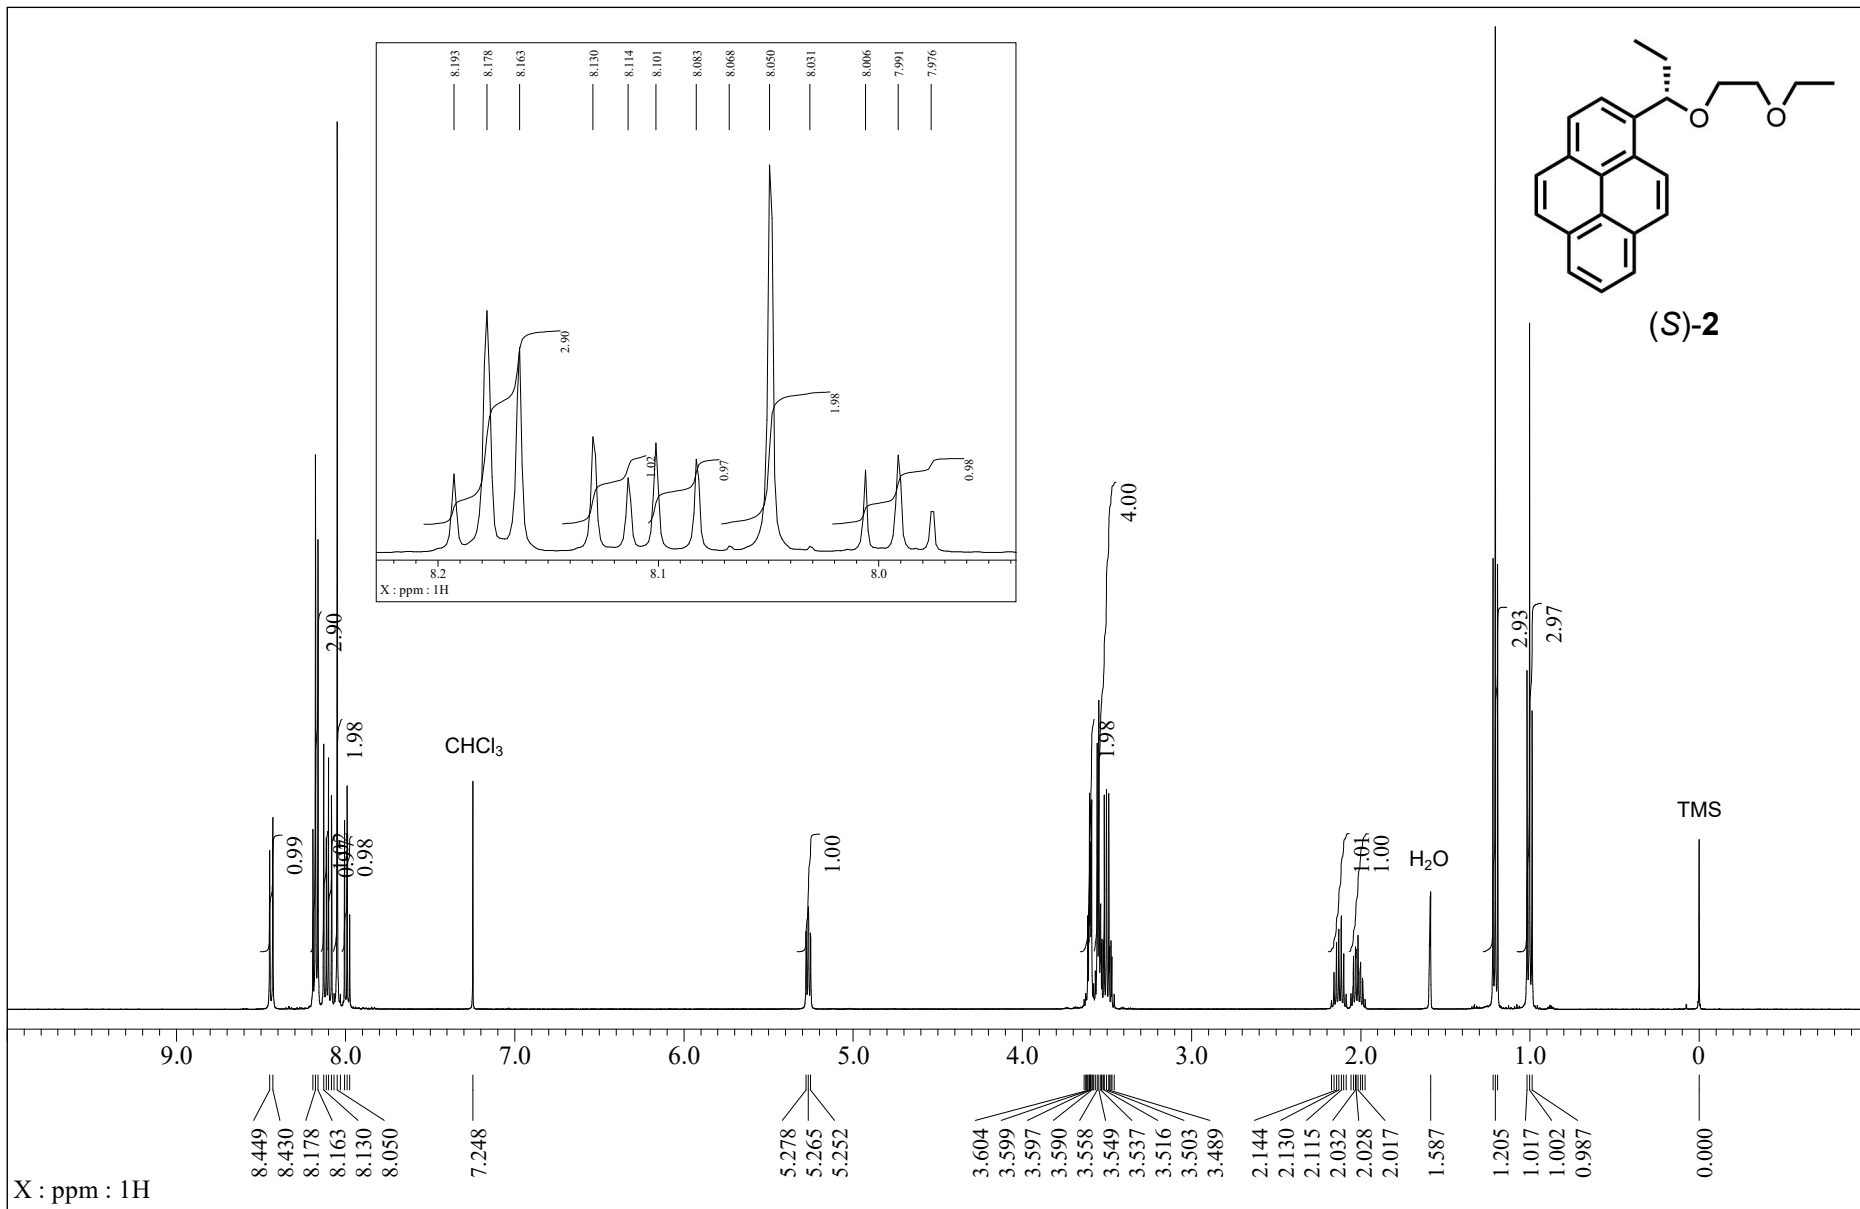



<sup>13</sup>C NMR of spectrum of (S)-2 (126 MHz, CDCl<sub>3</sub>,rt)

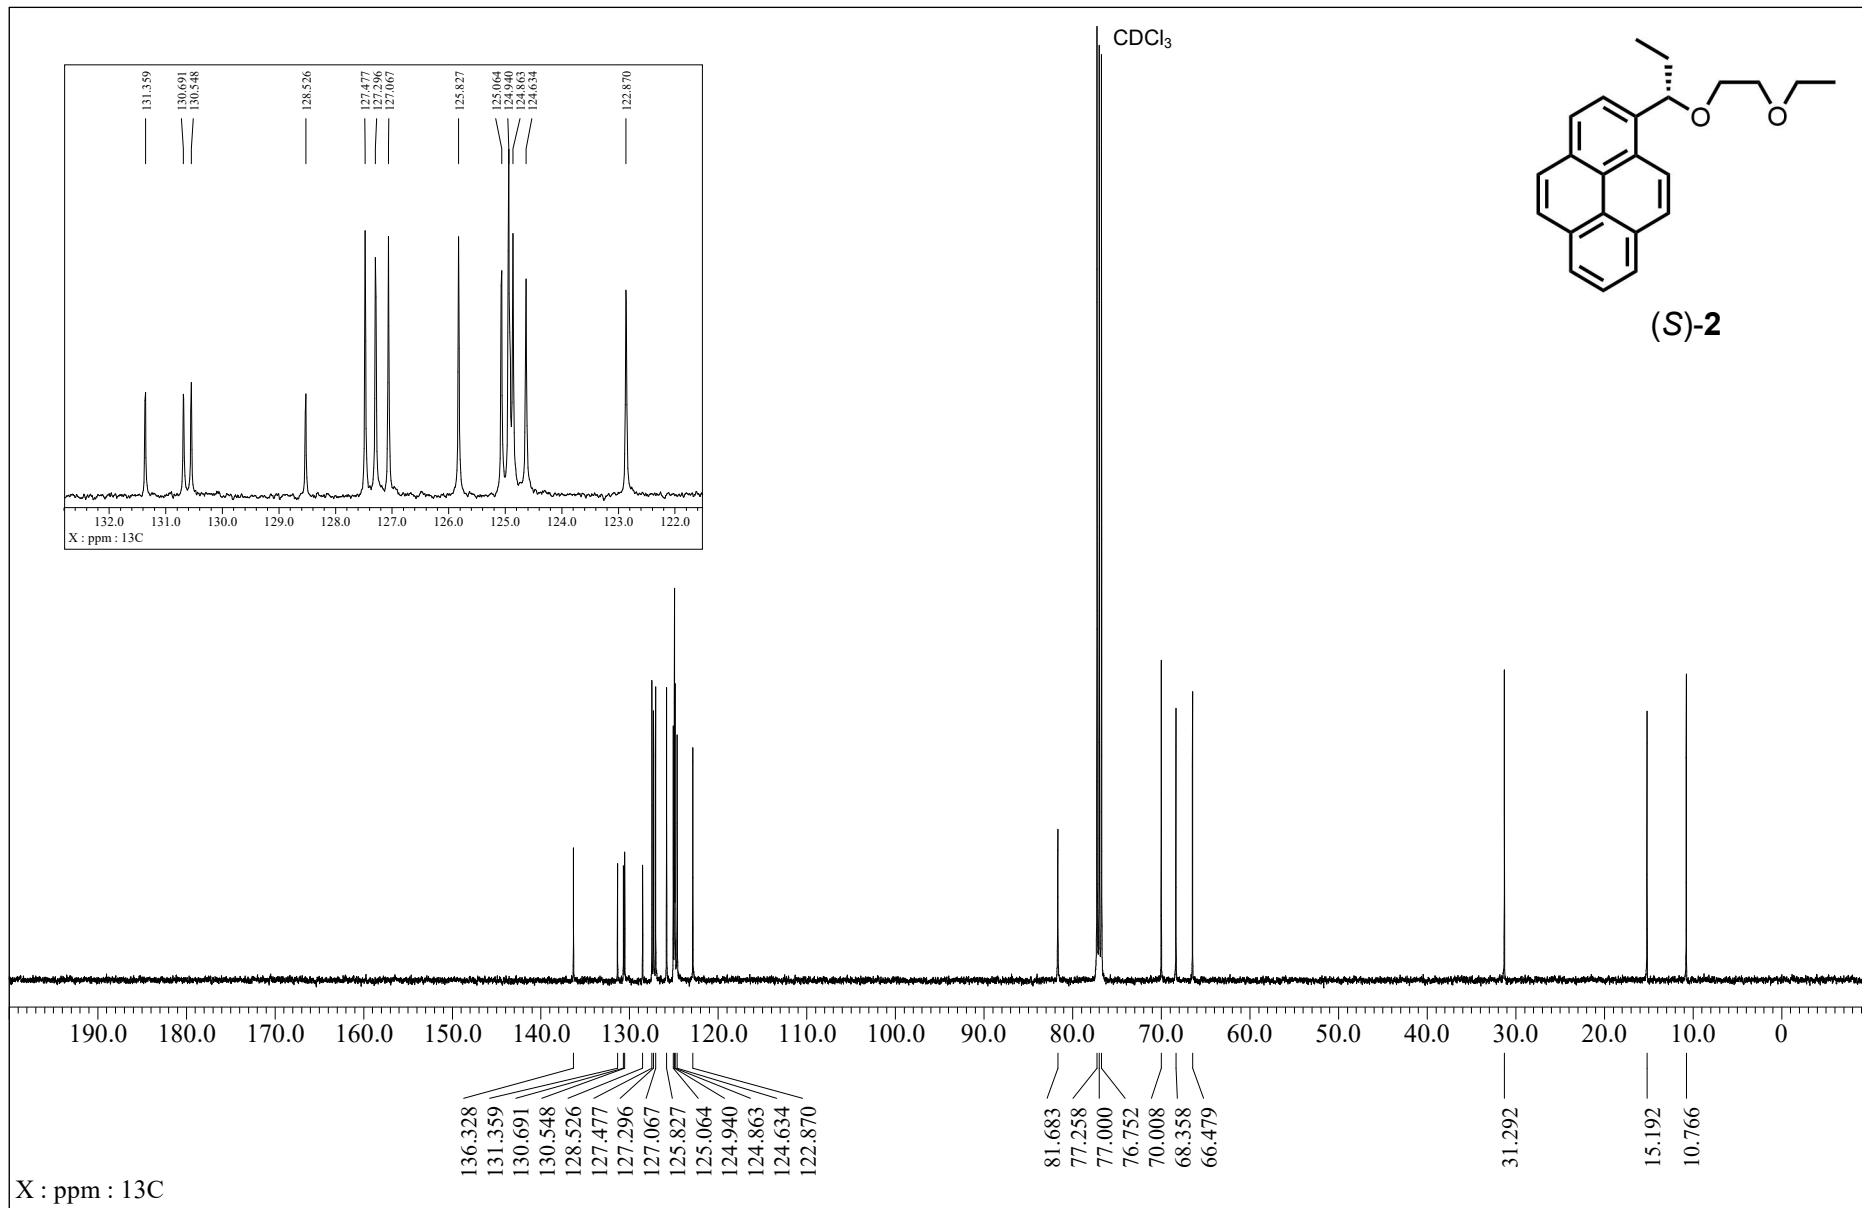

Supplement: d2nj00801g1.pdf [file d2nj00801g1.pdf]
